# Supplementary material for: Application of plasma metagenomic next-generation sequencing improves prognosis in hematology patients with neutropenia or hematopoietic stem cell transplantation for infection
Source: Front Cell Infect Microbiol. 2024 Feb 2;14:1338307. doi: 10.3389/fcimb.2024.1338307 (PMC10869557; doi:10.3389/fcimb.2024.1338307)
Supplement: Supplementary file 1 [file Table_1.docx]

Supplementary Material

Application of Plasma Metagenomic Next-generation Sequencing Improves Prognosis in Hematology Patients with Neutropenia or Hematopoietic Stem Cell Transplantation for Infection

Yuhui Chen 1†, Jinjin Wang 1†, Xinai Gan 1, Meng Li 1, Yi Liao 1, Yongzhao Zhou 2* and Ting Niu1*

†These authors contributed equally to this work and share first authorship

1 Department of Hematology, West China Hospital, Sichuan University, Chengdu, China

2 Integrated Care Management Center, West China Hospital, Sichuan University, Chengdu, China

*** Correspondence:
Ting Niu**

Department of Hematology, West China Hospital, Sichuan University, Chengdu, China

Email: niuting@wchscu.cn

Postal address: No. 37 GuoXueXiang Street，, Chengdu, Sichuan Province 610041, China.

**Yongzhao Zhou**

Integrated Care Management Center, West China Hospital, Sichuan University, Chengdu, Chinar

Email: [yongzhaozhou001@wchscu.cn](mailto:yongzhaozhou001@wchscu.cn)

Postal address: No. 37 GuoXueXiang Street, Chengdu, Sichuan Province 610041, China.

Table S1 Detection positive rates of pathogen in HSCT and non-HSCT groups

| Pathogen | Group | Positive Rate | P Value |
| --- | --- | --- | --- |
| Total | HSCT | 84.44% | 0.259 |
| Non-HSCT | 90.74% |
| Bacteria | HSCT | 33.3% | 0.664 |
| Non-HSCT | 37.0% |
| Virus | HSCT | 20.0% | 0.959 |
| Non-HSCT | 20.4% |
| Fungi | HSCT | 62.2% | 0.179 |
| Non-HSCT | 73.1% |

Table S2 Comparison of Adjustment and non- Adjustment groups

|  | Hospitalization Day, Median (quartile) | Time of  Neutropenia, Median (quartile) | CRP, Median (quartile) | PCT, Median (quartile) | IL-6, Median (quartile) |
| --- | --- | --- | --- | --- | --- |
| Adjustment | 50(35-73.5) | 7 (0-20) | 95(44.9-154) | 0.47(0.27-1.46) | 112.2(39.8-258.5) |
| Non- adjustment | 43(28-72) | 0(0-7) | 69.39(18-118) | 0.505(0.17-1.55) | 71.85(17.9-226.3) |
| P Value | 0.275 | **0.002** | **0.048** | 0.684 | 0.161 |

Table S3 Comparison of HSCT and non- HSCT groups

|  | Time of  Neutropenia, Median (quartile) | CRP, Median (quartile) | PCT, Median (quartile) | IL-6, Median (quartile) |
| --- | --- | --- | --- | --- |
| HSCT | 2(0-7) | 73.9(17.9-145) | 0.61(0.34-2.52) | 65.9(16.4-296) |
| Non- HSCT | 0(0-13.5) | 76.25(23.45-137) | 0.43(0.18-1.16) | 106.1(31.7-208) |
| P Value | 0.842 | 0.992 | 0.124 | 0.596 |
